# Supplementary material
Source: PubMed Central journal article supplement (PMC2958224)
Supplement: NIHMS212513-supplement-supplement_1.pdf [file NIHMS212513-supplement-supplement_1.pdf]

**Appendix Table S1.** Correlation between CPC-derived sleep indices and spectral heart rate variability components

| <b>Relationship</b> | <b>r (N=191)</b> | <b>r square</b> | <b>P value</b> |
|---------------------|------------------|-----------------|----------------|
| HFC vs. VLF         | -0.079           | 0.006           | 0.276          |
| HFC vs. LF          | -0.015           | <0.001          | 0.834          |
| HFC vs. HF          | 0.207            | 0.043           | 0.004          |
| HFC vs. LF/HF       | -0.376           | 0.141           | <0.001         |
| LFC vs. VLF         | 0.076            | 0.006           | 0.293          |
| LFC vs. LF          | 0.021            | <0.001          | 0.776          |
| LFC vs. HF          | -0.202           | 0.041           | 0.005          |
| LFC vs. LF/HF       | 0.357            | 0.127           | <0.001         |
| VLFC vs. VLF        | 0.021            | <0.001          | 0.771          |
| VLFC vs. LF         | -0.034           | 0.001           | 0.640          |
| VLFC vs. HF         | -0.121           | 0.015           | 0.094          |
| VLFC vs .LF/HF      | 0.169            | 0.029           | 0.020          |

r: Pearson's correlation coefficient

HFC: high-frequency coupling

LFC: low-frequency coupling

Yang AC

VLFC: very-low frequency coupling

VLF: very-low frequency component of heart rate variability (0.003-0.04 Hz)

LF: low-frequency component of heart rate variability (0.04-0.15 Hz)

HF: high-frequency component of heart rate variability (0.15-0.4 Hz)

LF/HF: low-frequency to high-frequency ratio

The spectral heart rate variability indices were log transformed.
